# Supplementary material for: Non-Destructive and Non-Invasive Measurement of Ethanol and Toxic Alcohol Strengths in Beverages and Spirits Using Portable Raman Spectroscopy
Source: MDPI journal article supplement (doi:10.3390/bios13010135), 2023-01-13
Supplement: s1 [file s1]

## Supplementary Data

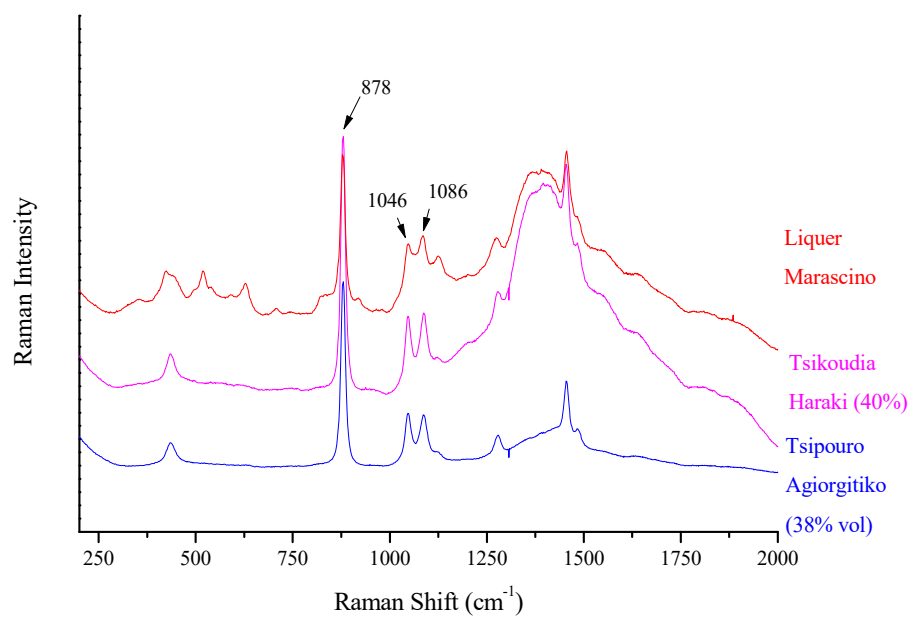

Figure S1. Raman spectra of colorless spirits.

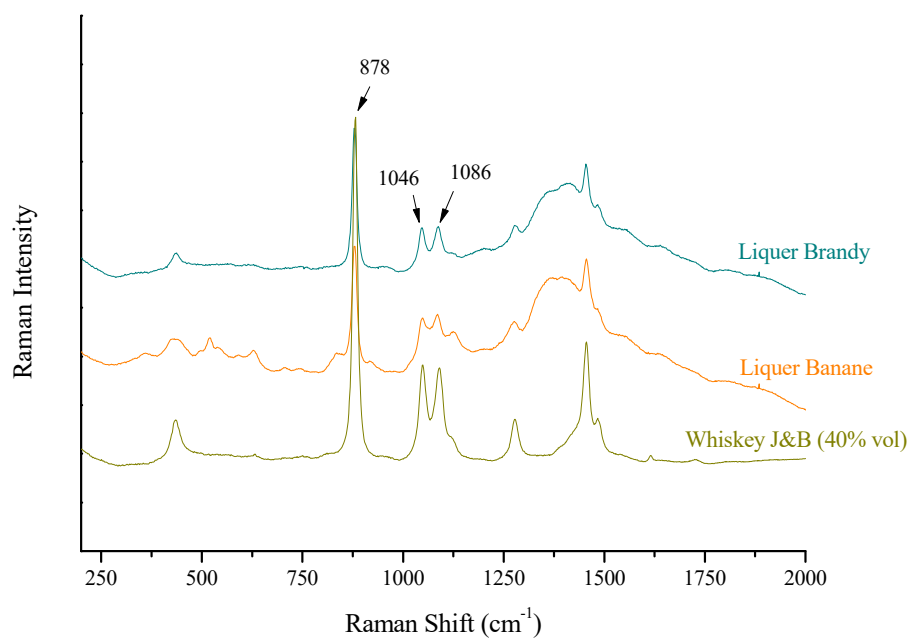

Figure S2. Raman spectra of yellow-color spirits.

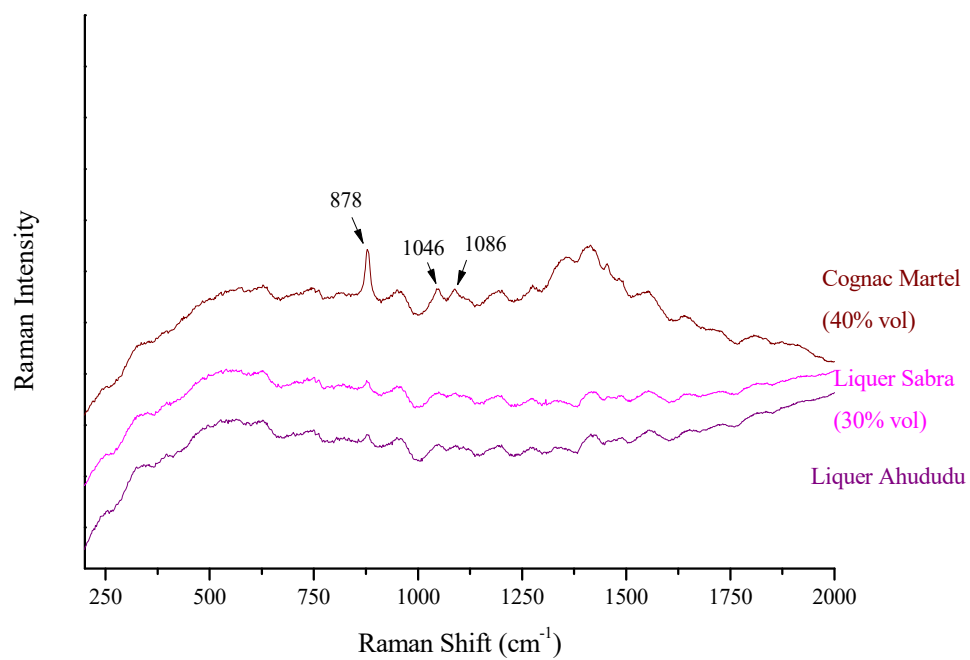

Figure S3. Raman spectra of red-color spirits.
